# Supplementary material
Source: ML conference proceedings conference paper supplement (https://openaccess.thecvf.com/content/CVPR2024/html/Terris_Equivariant_Plug-and-Play_Image_CVPR_2024_paper.html)
Supplement: Supplementary file 1 [file Terris_Equivariant_Plug-and-Play_Image_CVPR_2024_supplemental.pdf]

# Equivariant plug-and-play image reconstruction

## Supplementary Material

### 8. Details on the non-linear example

**Derivation of  $D_{\mathcal{G}}$**  We have

$$\begin{aligned} D_{\mathcal{G}}(x) &= \frac{1}{|\mathcal{G}|} \sum T_g^{-1} B_2 \text{prox}_{\gamma\lambda\|\cdot\|_1}(B_1 T_g x) \\ &= \frac{1}{|\mathcal{G}|} \sum T_g^{-1} (B_1 + P) T_g \text{prox}_{\gamma\lambda\|\cdot\|_1}(B_1 x) \\ &= \left( B_1 + \frac{1}{|\mathcal{G}|} \sum T_g^{-1} P T_g \right) \text{prox}_{\gamma\lambda\|\cdot\|_1}(B_1 x) \end{aligned} \quad (7)$$

yielding the desired result. The second step uses the fact that  $B_2 = B_1 + P$  and that  $B_1$  and  $\text{prox}$  are  $\mathcal{G}$ -equivariant functions. The third step just uses that  $B_1$  is a  $\mathcal{G}$ -equivariant function.

**Numerical details for Figure 2** For both the leftmost and rightmost examples, we consider the group  $\mathcal{G}$  consisting of permutations of the coordinates of the vectors. This is a group with a single element  $g$ , the matrix representation of its linear application being the unitary matrix

$$T_g = \begin{pmatrix} 0 & 1 \\ 1 & 0 \end{pmatrix}. \quad (8)$$

In the leftmost example, we use  $A = \text{diag}(2, 1)$ ,  $B_1 = I$  ( $B_1$  is thus  $\mathcal{G}$ -equivariant) and  $\lambda = 10$ . The perturbation and its  $\mathcal{G}$ -average are

$$P = \begin{pmatrix} -0.228 & -0.023 \\ 0.066 & 0.1 \end{pmatrix}, \quad P_{\mathcal{G}} = \begin{pmatrix} -0.064 & 0.022 \\ 0.022 & -0.064 \end{pmatrix},$$

with associated norms  $\|P\|_F = 0.26$ ,  $\|P_{\mathcal{G}}\|_F = 0.10$ . The (PnP) algorithm is ran with  $\gamma = 5e - 2$ .

In the rightmost example, we use  $A = \text{diag}(2, 5e - 4)$ ,  $B_1 = I$  and  $\lambda = 2$ . The perturbation and its  $\mathcal{G}$ -average are

$$P = \begin{pmatrix} 0.0275 & 0.0244 \\ 0.0112 & -0.1842 \end{pmatrix}, \quad P_{\mathcal{G}} = \begin{pmatrix} -0.0783 & 0.0178 \\ 0.0178 & -0.0783 \end{pmatrix},$$

with associated norms  $\|P\|_F = 0.0469$ ,  $\|P_{\mathcal{G}}\|_F = 0.0366$ . The (PnP) algorithm is ran with  $\gamma = 0.2$ .

### 9. MC sampling and Reynolds averaging

We compare in Table 5 the performance of the equivariant architecture when training with the proposed Monte-Carlo (MC) scheme vs the true averaging. It shows no difference in final performance while the MC strategy decrease the computational complexity by a factor 4.

| Architecture | Dataset | Monte-Carlo Sample | Reynolds Average   |
|--------------|---------|--------------------|--------------------|
| DnCNN        | BSD10   | 30.698 $\pm$ 1.645 | 30.684 $\pm$ 1.645 |
| DRUNet       | fastMRI | 30.678 $\pm$ 0.740 | 30.646 $\pm$ 0.752 |
| LipDnCNN     | Set3C   | 32.705 $\pm$ 0.868 | 32.706 $\pm$ 0.868 |

Table 5. Performance of algorithms from Fig. 4 when relying on Monte-Carlo estimates and averaged equivariant architectures.

### 10. Equivariant algorithms

The equivariant counterpart of (PnP) is

$$\begin{aligned} &\text{Sample } g_k \sim \mathcal{G} \\ &\text{Set } \tilde{D}_{\mathcal{G},k}(x) = T_{g_k}^{-1} D(T_{g_k} x) \\ &x_{k+1} = \tilde{D}_{\mathcal{G},k}(x_k - \gamma A^{\top}(Ax_k - y)). \end{aligned} \quad (\text{eq. PnP})$$

The equivariant counterpart of (RED) is

$$\begin{aligned} &\text{Sample } g_k \sim \mathcal{G} \\ &\text{Set } \tilde{D}_{\mathcal{G},k}(x) = T_{g_k}^{-1} D(T_{g_k} x) \\ &x_{k+1} = x_k - \gamma A^{\top}(Ax_k - y) \\ &\quad - \gamma\lambda(x_k - \tilde{D}_{\mathcal{G},k}(x_k)). \end{aligned} \quad (\text{eq. RED})$$

The equivariant counterpart of (ULA) is

$$\begin{aligned} &\text{Sample } g_k \sim \mathcal{G} \\ &\text{Set } \tilde{D}_{\mathcal{G},k}(x) = T_{g_k}^{-1} D(T_{g_k} x) \\ &x_{k+1} = x_k - \gamma A^{\top}(Ax_k - y) \\ &\quad - \gamma\lambda(x_k - \tilde{D}_{\mathcal{G},k}(x_k)) + \sqrt{2\gamma}\epsilon_k. \end{aligned} \quad (\text{eq. ULA})$$
